# Supplementary material for: Patients' Views on Financial Conflicts of Interest in Cancer Research Trials
Source: Atypon-hosted journal article supplement (doi:10.1056/nejmsa064160), 2006-11-30
Supplement: nejm_hampson_2330sa1.pdf [file nejm_hampson_2330sa1.pdf]

## Supplementary Appendix

This appendix has been provided by the authors to give readers additional information about their work.

Supplement to: Hampson LA, Agrawal M, Joffe S, Gross CP, Verter J, Emanuel EJ. Patients' views on financial conflicts of interest in cancer research trials. *N Engl J Med* 2006;355:2330-7.

Department of Clinical Bioethics  
National Institutes of Health

COVERSHEET ID#: \_\_\_\_\_

INTERVIEWER NAME: \_\_\_\_\_

DATE OF INTERVIEW: \_\_\_\_ / \_\_\_\_ / \_\_\_\_\_

DATE COI CONSENT SIGNED: \_\_\_\_ / \_\_\_\_ / \_\_\_\_\_

DID RESPONDENT GIVE CONTACT INFORMATION?      YES       NO

LENGTH OF INTERVIEW: \_\_\_\_\_ minutes

**SURVEY OF PATIENT VIEWS OF  
FINANCIAL RELATIONSHIPS  
IN THE RESEARCH SETTING**

\*\*\* Final 10/4/04 \*\*\*

Department of Clinical Bioethics  
National Institutes of Health

Confidential:      No information shall be presented or published in any way that would  
permit identification of any individual

**Survey of Patient Views of Financial Relationships in the  
Research Setting**

NAME: \_\_\_\_\_

ID NUMBER: \_\_\_\_\_

TELEPHONE NUMBER: \_\_\_\_\_

CHECK BOX IF R REFUSED TO PROVIDE NAME AND  
TELEPHONE NUMBER

\_\_\_\_\_

DATE OF INTERVIEW: \_\_\_\_\_

DATE CONFLICT OF INTEREST STUDY CONSENT SIGNED: \_\_\_\_\_

ID NUMBER \_\_\_\_\_

INTERVIEWER: PRIOR TO THE INTERVIEW SESSION, PLEASE REFER TO THE RESPONDENT'S RECORDS IN ORDER TO OBTAIN ANSWERS TO THE FOLLOWING QUESTIONS.

1. What type of cancer is the respondent being treated for?

\_\_\_\_\_

2. What year was the respondent diagnosed with this type of cancer?

3. Is the clinical research study that the respondent is enrolled in a phase I, I/II, II, III, or other? (Please mark the **PRIMARY** study in which the respondent is enrolled.)

Phase I.....

Phase I/II.....

Phase II.....

Phase III.....

Other: Specify \_\_\_\_\_

4. During this study, how many cycles of chemotherapy has the respondent received (by the end of today)?

5. Prior to enrolling in the clinical oncology study, how many different types of chemotherapy had the respondent received?

**NOTE TO INTERVIEWERS:**

**For any question that has a “depends” option listed, do NOT read that option. However, if the respondent replies in this way (i.e., depends/varies by circumstance), check the “depends” box and ask the listed follow-up question.**

**For any place where “(cancer center)” appears, substitute the appropriate name of the institution at which the interview is taking place.**

**READ THE FOLLOWING:****Introduction**

In the research setting, often doctors and institutions can receive money from or invest money in drug companies, sometimes the same drug companies that they are performing research studies for. These financial ties can come from many sources, which can include receiving money for consultations to the drug company, speaking at a company-sponsored event, owning stock in the company, or receiving money in the form of payments for a patent. We are interested in your opinions about these kinds of financial ties of both research doctors and cancer centers. You may not know the answers to some questions and that is okay. You may not have thought about some topics before today, and that is okay too. Just try to answer the questions as best you can.

**Disclaimer**

The questions you will answer today do not in any way imply that that your research doctor or cancer center has any of these kinds of financial ties. In fact, we do not have any information about financial ties of the researchers at your cancer center or the cancer center itself. We will **not** give any of the information you provide to us to your doctors or the cancer center. All of your responses will be kept confidential, and answering these questions will have no effect on your treatment here.

TIME NOW \_\_\_\_\_

**PART A**

**1. In general, how active have you been in the last four weeks? Would you say...**

- You have normal activity.....
- You have symptoms, but are not bedridden.....
- You require some bed time, but need to be  
in bed less than 50% of the day.....
- You are bedridden more than 50% of the day.....
- You are totally bedridden.....
- DON'T KNOW.....
- REFUSED.....

**2. Aside from everyday kinds of pain like minor headaches, sprains, or toothaches, how much pain have you had during the last four weeks? Would you say you have had...**

- A lot of pain.....
- A moderate amount of pain.....
- A little pain.....
- No pain at all.....
- DON'T KNOW.....
- REFUSED.....

**3. How much of the time during the past four weeks have you felt downhearted and blue? Would you say:**

- All of the time.....
- Most of the time.....
- A good bit of the time.....
- Some of the time.....
- A little of the time.....
- None of the time.....
- DON'T KNOW.....
- REFUSED.....

4. **Think back to the time before you enrolled in your cancer study at (cancer center). How seriously did you consider any treatment options at that time other than participating in your current cancer study at (cancer center)? These could include receiving standard chemotherapy or radiation treatment, entering into different clinical research studies, hospice, or using alternative medicine remedies.**

Very seriously.....   
 Moderately seriously.....   
 Slightly seriously.....   
 Not seriously at all.....

DON'T KNOW.....   
 REFUSED.....

## **PART B**

5. **For how many months or years have you been cared for by the *doctor who you see the most* when you come to (cancer center)?**

SPECIFY NUMBER OF MONTHS    
 SPECIFY NUMBER OF YEARS

DON'T KNOW.....   
 REFUSED.....

**When you answer questions about “your doctor” during this survey, please think of the doctor who you see most often when you come to (cancer center).**

6. **How likely do you think it is that the drug treatment you are receiving in your cancer study will prolong your life?**

Very unlikely.....   
 Somewhat unlikely.....   
 Somewhat likely.....   
 Very likely.....

DON'T KNOW.....   
 REFUSED.....



**PART C**

9. I will now ask you questions about financial ties related to your cancer study. In the following questions you will be asked both about the doctor that you see most often when you come to (cancer center), and similar questions about (cancer center) itself.

In the past six months, how much have you heard about financial ties related to clinical research studies in the news?

- A lot.....   
 A moderate amount.....   
 A little.....   
 None.....   
  
 DON'T KNOW.....   
 REFUSED.....

10. Sometimes doctors running clinical research studies have financial ties with the company that makes the drug used in the study. How worried, if at all, are you about your doctor at (cancer center) having these financial ties?

- Very worried.....   
 Somewhat worried.....   
 A little worried.....   
 Not at all worried.....  → SKIP TO Q12  
  
 DON'T KNOW.....  → SKIP TO Q13  
 REFUSED.....  → SKIP TO Q13

11. Please explain to me what worries you regarding these financial ties.  
 INTERVIEWER: AFTER RESPONDENT ANSWERS, SKIP TO Q13.

---



---



---



---

**12. Please tell me which of the listed reasons explain why you are not worried about your doctors' financial ties. Please rank the first, second, and third most important reasons. If you don't have three reasons, rank the first and second, or tell me the one most important.**

**INTERVIEWER SHOW CARD B**

**ENTER NUMBERS 1, 2, AND 3 IN BOXES**

- a. You had not thought about such financial ties.....  → Skip to Q13
- b. You had thought about these financial ties but did not think they would influence your medical care in the study.....
- c. You had thought about these financial ties but didn't think your doctor had any financial ties.....
- d. You had thought about these financial ties but thought that your doctor would not be influenced by them.....
- e. You had thought about these financial ties but trusted that there was some oversight system or regulation in place to manage or prohibit these financial ties.....
- f. Other.....   
Please specify: \_\_\_\_\_  
\_\_\_\_\_  
\_\_\_\_\_
- DON'T KNOW.....
- REFUSED.....

**13. Sometimes cancer centers where clinical research studies are done have financial ties with the company that makes the drug used in the study. How worried, if at all, are you about (*cancer center*) having these financial ties?**

- Very worried.....
- Somewhat worried.....
- A little worried.....
- Not at all worried.....  → SKIP TO Q15
- DON'T KNOW.....  → SKIP TO Q16
- REFUSED.....  → SKIP TO Q16

14. Please explain to me what worries regarding these financial ties.  
**INTERVIEWER: AFTER RESPONSE, PLEASE SKIP TO Q16.**

---



---



---



---

15. Please tell me which of the listed reasons explain why you are **not worried** about the financial ties of (*cancer center*). Please rank the first, second, and third most important reasons. If you don't have three reasons, rank the first and second, or tell me the one most important.

**INTERVIEWER SHOW CARD C**

**ENTER NUMBER 1, 2 AND 3 IN BOXES**

- a. You had not thought about such financial ties.....  → Skip to Q16
- b. You had thought about these financial ties but  
 thought that they would not affect your medical  
 care in the study.....
- c. You had thought about these financial ties but  
 didn't think the cancer center had any financial ties.....
- d. You had thought about these financial ties but  
 trusted that there was some oversight system or regulation  
 in place to manage or prohibit these financial ties.....
- e. Other.....   
 Please specify: \_\_\_\_\_
- DON'T KNOW.....
- REFUSED.....

16. Do you think there are safeguards in place at (cancer center) for overseeing financial ties between **doctors** running studies and the related drug companies?

- YES.....
- NO.....  → Skip to Q18
- DON'T KNOW.....  → Skip to Q18
- REFUSED.....  → Skip to Q18

**17. If possible, can you explain what any of these safeguards are?**

---

---

---

REFUSED.....   
DON'T KNOW.....

**18. Do you think there are safeguards in place for overseeing financial ties between (cancer center) and drug companies related to studies being done here?**

YES.....   
NO.....  → Skip to Q20  
DON'T KNOW.....  → Skip to Q20  
REFUSED.....  → Skip to Q20

**19. If possible, can you explain what any of these safeguards are?**

---

---

---

DON'T KNOW.....   
REFUSED.....

**INTERVIEWER: ONLY ASK NEXT QUESTION IF RESPONDENT HAS ANSWERED  
“YES” TO EITHER Q16 OR Q18.**

**20. Do you think the oversight system for regulating the financial ties of (cancer center) and its doctors is better, worse, or about the same as the regulations at other cancer centers?**

The oversight system is...

- Better here than at other cancer centers.....
- Worse here than at other cancer centers.....
- About the same here as at other cancer centers.....
- DON'T KNOW.....
- REFUSED.....

**21. If your doctor at (cancer center) had financial ties to the drug company related to your study, who do you think should be informed about these ties?**

**INTERVIEWER: SHOW CARD D**

- |                                                                                       | <u>CHECK ALL<br/>THAT APPLY</u> | <u>CHECK ONE</u>         |
|---------------------------------------------------------------------------------------|---------------------------------|--------------------------|
|                                                                                       | <u>Should Be Informed</u>       | <u>Most Important</u>    |
| a. A government agency.....                                                           | <input type="checkbox"/>        | <input type="checkbox"/> |
| b. (Cancer center).....                                                               | <input type="checkbox"/>        | <input type="checkbox"/> |
| c. An oversight committee<br>independent of (cancer center).....                      | <input type="checkbox"/>        | <input type="checkbox"/> |
| d. The patients participating in the clinical trial.....                              | <input type="checkbox"/>        | <input type="checkbox"/> |
| e. Your doctor should decide who to tell.....                                         | <input type="checkbox"/>        | <input type="checkbox"/> |
| f. No one should be told of these financial ties .....                                | <input type="checkbox"/>        | <input type="checkbox"/> |
| g. Is there some other group you<br>think should be informed?<br>Please specify:_____ | <input type="checkbox"/>        | <input type="checkbox"/> |
| DON'T KNOW.....                                                                       | <input type="checkbox"/>        | <input type="checkbox"/> |
| REFUSED.....                                                                          | <input type="checkbox"/>        | <input type="checkbox"/> |

22. Think back to when you were ready to sign up for your cancer study. Imagine that you learned that your doctor at (cancer center) had financial ties with the company that makes the drugs used in your study. I will read you a list of each potential tie; please tell me whether it would have influenced your decision to participate in your cancer study.

**INTERVIEWER READ RESPONSES.  
CHECK ONE BOX FOR EACH QUESTION.**

*Would that have...*  
**Influenced Influenced**  
**You To You Not to**  
**Participate Participate**    **Made No**    **IT**    **DON'T RE-**  
**Participate Participate**    **Difference**    **DEPENDS**    **KNOW FUSED**

**If your doctor...**

- |                                                                                                                   |                          |                          |                          |                            |                          |                          |
|-------------------------------------------------------------------------------------------------------------------|--------------------------|--------------------------|--------------------------|----------------------------|--------------------------|--------------------------|
| a. Owned stock in the drug company whose drug is being used in the study                                          | <input type="checkbox"/> | <input type="checkbox"/> | <input type="checkbox"/> | <input type="checkbox"/> * | <input type="checkbox"/> | <input type="checkbox"/> |
| b. Received payment from the drug company for offering advice about their area of expertise                       | <input type="checkbox"/> | <input type="checkbox"/> | <input type="checkbox"/> | <input type="checkbox"/> * | <input type="checkbox"/> | <input type="checkbox"/> |
| c. Received payment from the drug company to give lectures, including some that might discuss the company's drugs | <input type="checkbox"/> | <input type="checkbox"/> | <input type="checkbox"/> | <input type="checkbox"/> * | <input type="checkbox"/> | <input type="checkbox"/> |
| d. Received payment for having a patent used by the drug company                                                  | <input type="checkbox"/> | <input type="checkbox"/> | <input type="checkbox"/> | <input type="checkbox"/> * | <input type="checkbox"/> | <input type="checkbox"/> |

**INTERVIEWER: FOR ALL "IT DEPENDS" RESPONSES ASK:**

**Under what circumstances would this financial tie have influenced your decision to participate in the study?**

\*a. \_\_\_\_\_

\*b. \_\_\_\_\_

\*c. \_\_\_\_\_

\*d. \_\_\_\_\_

**INTERVIEWER:**

**BOX 1**  CHECK THIS BOX IF RESPONDENT HAS, FOR ANY RESPONSE, ANSWERED “INFLUENCED YOU NOT TO PARTICIPATE”

**BOX 2**  CHECK THIS BOX IF RESPONDENT HAS, FOR ANY RESPONSE, ANSWERED “INFLUENCED YOU TO PARTICIPATE” AND/OR “MAKES NO DIFFERENCE” AND/OR “IT DEPENDS”.

**23. INTERVIEWER: ASK THIS QUESTION ONLY IF BOX 1 WAS CHECKED IN Q22. OTHERWISE, SKIP TO Q24.**

**I will read you a list of reasons why you might have chosen not to participate in your cancer study after learning about the financial ties that could exist between your doctor and the drug company. Please rank the first and second most important reasons. If you don't have two reasons, tell me the one most important reason.**

**INTERVIEWER SHOW CARD E**

**You might have chosen not to participate because you think that financial ties might lead your doctor to...**

**ENTER NUMBER 1 AND 2 IN BOXES**

- a. Expose you to greater risk.....
- b. Falsify or exaggerate the research results.....
- c. Weaken the trust between you and your doctor.....
- d. Require you to spend more time doing activities related to the study, such as coming to the cancer center more often or having to do more medical tests.....
- e. Other:.....   
Please Specify: \_\_\_\_\_
- DON'T KNOW.....
- REFUSED.....

**24. INTERVIEWER: ASK THIS QUESTION ONLY IF BOX 2 WAS CHECKED IN Q22 OTHERWISE SKIP TO Q25.**

**Please tell me which of the reasons that I will list best identify why you would still participate in your cancer study in spite of knowing about financial ties between your doctor and the drug company. Please rank the first and second most important reasons. If you don't have two reasons, tell me the one most important reason.**

**INTERVIEWER: SHOW CARD F**

**You think that...**

**ENTER NUMBER 1 AND 2 IN BOXES**

- a. It is *not* a problem for doctors to have these types of financial ties.....
- b. These financial ties would not really influence your medical care .....
- c. The financial ties of your doctor would improve your medical care.....
- d. The cancer center would ensure that these financial ties would not affect your care.....
- e. You have no alternative treatment options as good as this clinical research study.....
- f. This clinical research study provides you access to doctors who are the most qualified to treat your cancer.....
- g. This clinical research study provides you the best therapeutic treatment .....
- h. Other.....

Please specify: \_\_\_\_\_

\_\_\_\_\_

DON'T KNOW.....

REFUSED.....

25. Now I will ask you about financial ties between (cancer center) and the drug company related to your study .

Again, after I read each potential tie, please tell me, if you had known about these ties before enrolling in your cancer study, whether it would have influenced your decision to participate in the study.

**INTERVIEWER: READ RESPONSES. CHECK ONE BOX FOR EACH QUESTION.**

*Would that have...*

**Influenced Influenced  
You To You Not to Made No IT DON'T  
Participate Participate Difference DEPENDS\* KNOW REFUSED**

**How would it have affected your decision to participate if (cancer center)...**

- a. Owned stock in the drug company whose drug is being used in the study    \*
- b. Received a payment for each patient enrolled in the cancer study to cover the costs of doing the research    \*
- c. Received payments for having a patent used by the drug company    \*

**INTERVIEWER: FOR ALL "IT DEPENDS" RESPONSES ASK:**

**Under what circumstances would this financial tie have influenced your decision to participate in the study?**

\*a. \_\_\_\_\_

\*b. \_\_\_\_\_

\*c. \_\_\_\_\_

**INTERVIEWER:**

**BOX 1**  CHECK THIS BOX IF RESPONDENT HAS, FOR ANY RESPONSE, ANSWERED “INFLUENCED YOU NOT TO PARTICIPATE”

**BOX 2**  CHECK THIS BOX IF RESPONDENT HAS, FOR ANY RESPONSE, ANSWERED ‘INFLUENCED YOU TO PARTICIPATE’ AND/OR “MAKES NO DIFFERENCE” AND/OR “IT DEPENDS.”

**26. INTERVIEWER: ASK THIS QUESTION ONLY IF BOX 1 WAS CHECKED IN Q25. OTHERWISE SKIP TO Q27.**

I will read you a list of reasons why you might have chosen not to participate in your cancer study after learning about the financial ties that could exist between (cancer center) and the drug company related to your study. Please rank the first and second most important reasons. If you do not have two reasons, tell me the one most important reason.

**INTERVIEWER: SHOW CARD G**

**You might choose not to participate because the financial ties might cause (cancer center) to...**

**ENTER NUMBER 1 AND 2 IN BOXES**

- a. Pay too little attention to the potential bad effects of the study treatment on patients.....
- b. Approve a study that isn't safe or scientifically necessary.....
- c. Accept patients into studies when they are not eligible.....
- d. Have less regulation and fewer checks on doctors running research studies.....
- e. Other: .....   
Please specify: \_\_\_\_\_
- DON'T KNOW
- REFUSED

**27. INTERVIEWER: ASK THIS QUESTION ONLY IF BOX 2 WAS CHECKED IN Q25 OTHERWISE SKIP TO Q28.**

**Please tell me which of the reasons that I will list best identify why you would still participate in your cancer study in spite of knowing about (*cancer center's*) financial ties with the drug company. Please rank the first and second most important reasons. If you don't have two reasons, tell me the one most important reason.**

**INTERVIEWER SHOW CARD H**

**You think that...**

**ENTER NUMBER 1 AND 2 IN BOXES**

- a. It is *not* a problem for cancer centers to have these types of financial ties .....
- b. Such ties would *not* affect your medical care in any way.....
- c. The financial ties of your cancer center would improve your medical care.....
- d. There is regulation and oversight to make sure that these financial ties do not become a problem for the cancer center .....
- e. You have no alternative treatment options as good as this clinical research study.....
- f. This clinical research study provides you access to doctors who are the most qualified to treat your cancer .....
- g. This clinical research study provides you the best therapeutic treatment options available.....
- h. Other.....

Please specify: \_\_\_\_\_

DON'T KNOW.....

REFUSED.....

28. Now I will lead you a list of financial ties that your doctor at (cancer center) could have with the drug company related to your study. Please tell me which ones, if any, you think your doctor should be permitted to have.

Should your doctor  
be permitted to...

**INTERVIEWER: READ YES AND NO RESPONSES**

|                                                                                                                  | <u>Yes</u>               | <u>No</u>                | <u>DEPENDS*</u>            | <u>DK</u>                | <u>REFUSED</u>           |
|------------------------------------------------------------------------------------------------------------------|--------------------------|--------------------------|----------------------------|--------------------------|--------------------------|
| a. Own stock in the drug company whose drug is being used in the study                                           | <input type="checkbox"/> | <input type="checkbox"/> | <input type="checkbox"/> * | <input type="checkbox"/> | <input type="checkbox"/> |
| b. Receive payment for offering advice to the drug company in their area of expertise                            | <input type="checkbox"/> | <input type="checkbox"/> | <input type="checkbox"/> * | <input type="checkbox"/> | <input type="checkbox"/> |
| c. Receive payment from the drug company to give lectures, including some that might discuss the company's drugs | <input type="checkbox"/> | <input type="checkbox"/> | <input type="checkbox"/> * | <input type="checkbox"/> | <input type="checkbox"/> |
| d. Receive payments for having a patent being used by the drug company                                           | <input type="checkbox"/> | <input type="checkbox"/> | <input type="checkbox"/> * | <input type="checkbox"/> | <input type="checkbox"/> |

**INTERVIEWER: FOR ALL "DEPENDS" RESPONSES ASK:  
Under what circumstances is this type of financial tie ok?**

\*a. \_\_\_\_\_

\*b. \_\_\_\_\_

\*c. \_\_\_\_\_

\*d. \_\_\_\_\_

29. Similarly, now I will read you a list of financial ties that (*cancer center*) could have with the drug company related to your study. Again, please tell me which ones, if any, you think (*cancer center*) should be permitted to have.

Should (*cancer center*) be permitted to...

**INTERVIEWER READ YES AND NO RESPONSES**

|                                                                                                             | <u>Yes</u>               | <u>No</u>                | <u>DEPENDS*DK</u>          | <u>REFUSED</u>           |
|-------------------------------------------------------------------------------------------------------------|--------------------------|--------------------------|----------------------------|--------------------------|
| a. Own stock in the drug company whose drug is being used in the study                                      | <input type="checkbox"/> | <input type="checkbox"/> | <input type="checkbox"/> * | <input type="checkbox"/> |
| b. Receive a payment for each patient enrolled in the cancer study to cover the costs of doing the research | <input type="checkbox"/> | <input type="checkbox"/> | <input type="checkbox"/> * | <input type="checkbox"/> |
| c. Receive payments for having a patent being used by the drug company                                      | <input type="checkbox"/> | <input type="checkbox"/> | <input type="checkbox"/> * | <input type="checkbox"/> |

**INTERVIEWER: FOR ALL "DEPENDS" RESPONSE ASK:**

**Under what circumstances do you think this type of financial tie is ok?**

\*a. \_\_\_\_\_

\*b. \_\_\_\_\_

\*c. \_\_\_\_\_

**30. Thinking about financial ties that your doctor at (cancer center) could have with the drug company related to your cancer study, select one of the following.  
INTERVIEWER SHOW CARD I.**

**Do you think that your doctor at (cancer center) should...**

**CHECK ONE**

- a. Not be required to tell financial ties to research participants.....
- b. Be required to tell financial ties to research participants if ties total more than a certain amount of money per year.....  GO TO 30A
- c. Be required to tell financial ties to research participants regardless of the amount of money.....
- d. Be required to tell research participants about the oversight system and regulation in place to manage or prohibit these financial ties if they exist.....
- e. Other.....

Please specify: \_\_\_\_\_

- DON'T KNOW.....
- REFUSED.....

**ASK Q30A IF THEY ANSWER "B" TO Q30.**

Q30A. What would be the amount of money per year? PLEASE SPECIFY:

\_\_\_\_\_

- DON'T KNOW.....
- REFUSED.....

**31. Now thinking about financial ties that (*cancer center*) could have with the drug company related to your cancer study, select one of the following.**

**INTERVIEWER SHOW CARD I.**

**Do you think that (*cancer center*) should...**

- a. Not be required to tell financial ties to research participants.....
- b. Be required to tell financial ties to research participants if ties total more than a certain amount of money per year.....  GO TO 31A
- c. Be required to tell financial ties to research participants regardless of the amount of money.....
- d. Be required to tell research participants about the oversight system and regulation in place to manage or prohibit these financial ties if they exist.....
- e. Other.....

Please specify: \_\_\_\_\_

DON'T KNOW.....

REFUSED.....

**ASK 31A IF THEY ANSWER "B" TO Q31.**

31A. What would be the amount of money per year? PLEASE SPECIFY:

\$ \_\_\_\_\_

DON'T KNOW.....

REFUSED.....

**32. I will now ask you a few of the same questions that I have already asked to see if your opinions have changed at all after learning more about financial ties. Please feel free to change your answers from what you answered in the beginning if you now feel differently.**

**How worried are you *now*, if at all, about financial ties between your doctor at (cancer center) and the drug company related to your cancer study?**

Very worried.....   
 Somewhat worried.....   
 A little worried.....   
 Not at all worried.....  →SKIP TO Q34

DON'T KNOW.....  →SKIP TO Q34  
 REFUSED.....  →SKIP TO Q34

**33. What *now* worries you about these financial ties?**

---



---



---



---

**34. How worried are you *now*, if at all, about financial ties between (cancer center) and the drug company related to your cancer study?**

Very worried.....   
 Somewhat worried.....   
 A little worried.....   
 Not at all worried.....  →SKIP TO Q36

DON'T KNOW.....  →SKIP TO Q36  
 REFUSED.....  →SKIP TO Q36

**35. What *now* worries you about these financial ties?**

---



---



---



---

**36. In general, how has taking this survey made you feel? You may select more than one answer.**

**INTERVIEWER: SHOW CARD J.**

**CHECK ALL THAT APPLY**

- a. More worried about financial ties related to clinical research .....
  - b. Less worried about financial ties related to clinical research .....
  - c. More informed about financial ties related to clinical research.....
  - d. Less willing to participate in clinical research.....
  - e. More likely to ask about financial ties when deciding whether  
to participate in clinical research in the future.....
  - f. More interested in being told about financial ties  
before enrolling in a clinical research study.....
  - g. More interested in knowing about the oversight system and regulation  
in place to manage or prohibit financial ties if they exist.....
  - h. Other:\_\_\_\_\_
- 
- DON'T KNOW.....
- REFUSED.....

**PART D****37. CODE R'S GENDER. DO NOT ASK.**MALE..... FEMALE..... **38. In what month and year were you born?**MONTH.....  YEAR.....    DON'T KNOW..... REFUSED..... **39. What race do you consider yourself?****INTERVIEWER: IF R REPORTS MULTIRACIAL, MARK OTHER.**White, not of Hispanic origin..... Hispanic..... Black, not of Hispanic origin..... American Indian or Alaska Native..... Asian or Pacific Islander..... OTHER or UNKNOWN..... 

SPECIFY OTHER RACE HERE: \_\_\_\_\_

REFUSED.....

**40. What religion do you consider yourself?**

Protestant (including Baptist, Methodist,  
Lutheran, Presbyterian, Episcopal, etc.).....

Catholic.....

Jewish.....

Muslim.....

Hindu.....

Buddhist.....

Atheist.....

None.....

Other.....

SPECIFY OTHER HERE: \_\_\_\_\_

DON'T KNOW.....

REFUSED.....

**41. What is the highest grade or year of school you have completed?**

Didn't finish high school.....

High school graduate.....

Some college or university.....

College or university graduate.....

Post graduate.....

DON'T KNOW.....

REFUSED.....

**42. Before taxes, what was your household's total income last year? Include income received from social security or disability payments.**

**INTERVIEWER: SHOW CARD K WITH MONETARY RANGES**

- Under \$25,000.....  
 \$25,000-\$49,999.....  
 \$50,000-\$74,999.....  
 \$75,000-\$99,999.....  
 Over \$100,000.....  
  
 DON'T KNOW.....  
 REFUSED.....

**43. Do you have health insurance? Include Medicare, Medicaid, or Tricare if you have them, but exclude dental insurance.**

- YES.....  
 NO.....  
  
 DON'T KNOW.....  
 REFUSED.....

**44. Are you on disability?**

- YES.....  
 NO.....  
  
 DON'T KNOW.....  
 REFUSED.....

**45. What is your employment status? Are you currently...**

- Employed full time (that is, working 32 hours or more per week).....  
 Employed part time.....  
 Not working but not retired.....  
 Retired.....  
  
 DON'T KNOW.....  
 REFUSED.....

**TIME NOW \_\_\_\_\_**
